# Supplementary material for: Biologics Prescribing for Rheumatoid Arthritis in Older Patients: A Single-Center Retrospective Cross-Sectional Study
Source: PubMed Central journal article supplement — Rheumatol Ther. 2015 Nov 25;2(2):165–72. doi: 10.1007/s40744-015-0021-z (PMC4883268; doi:10.1007/s40744-015-0021-z), 2015-11-25
Supplement: 40744_2015_21_MOESM1_ESM.pdf [file 40744_2015_21_MOESM1_ESM.pdf]

- Rheumatoid arthritis (RA) causes considerable morbidity and mortality, which could be reduced through effective treatment, including the use of biologic treatments.
- Effective treatment, including the use of biologic agents, can reduce this.
- In a single centre, older patients with RA are less likely to be prescribed biologic treatment than younger patients.
- Patients with RA aged 65 years and older and on biologics had similar healthcare use to those not on biologics, suggesting similar levels of comorbidity.

This summary slide represents the opinions of the authors. No funding or sponsorship was received for this study or publication of this article. For a full list of acknowledgments and disclosures for all authors of this article, please see the full text online. © The Author(s) 2015. Creative Commons Attribution Noncommercial License (CC BY-NC).
